# Supplementary material
Source: ML conference proceedings conference paper supplement (https://openaccess.thecvf.com/content/CVPR2022/html/Ma_Surface_Reconstruction_From_CVPR_2022_paper.html)
Supplement: Supplementary file 2 [file Ma_Surface_Reconstruction_From_CVPR_2022_supplemental.zip]

Archive with 2 entries (2 files):
- 00536.mp4
- CVPR_2022_PredictiveContextPrior_Supp.pdf
